# Supplementary material
Source: PubMed Central journal article supplement (PMC3832127)
Supplement: NIHMS523574-supplement-01.pdf [file NIHMS523574-supplement-01.pdf]

**Supplementary Table. Univariate analyses of risk factors for rate of mortality+relapse during second year post-hematopoietic cell transplantation (HCT).**

|                        | AML  |                          |         | ALL  |                          |        |
|------------------------|------|--------------------------|---------|------|--------------------------|--------|
|                        | N    | Rate difference (95% CI) | P       | N    | Rate difference (95% CI) |        |
| ANC engraftment        |      |                          |         |      |                          |        |
| < 16 days              | 1439 | Ref                      |         | 573  | Ref                      |        |
| ≥ 16 days              | 1844 | -0.024 (-0.052 – 0.003)  | 0.09    | 837  | 0.024 (-0.029 – 0.078)   | 0.37   |
| Platelet engraftment   |      |                          |         |      |                          |        |
| < 23 days              | 1215 | Ref                      |         | 469  | Ref                      |        |
| ≥ 23 days              | 1109 | -0.009 (-0.043 – 0.025)  | 0.60    | 547  | 0.046 (-0.019 – 0.110)   | 0.17   |
| Gender                 |      |                          |         |      |                          |        |
| Male                   | 1740 | Ref                      |         | 878  | Ref                      |        |
| Female                 | 1575 | -0.008 (-0.035 - 0.019)  | 0.56    | 548  | -0.016 (-0.070 – 0.038)  | 0.56   |
| D/R gender             |      |                          |         |      |                          |        |
| Other                  | 2585 | Ref                      |         | 1105 | Ref                      |        |
| Female/Male            | 716  | 0.009 (-0.025 – 0.043)   | 0.61    | 313  | 0.135 (0.059 – 0.211)    | 0.0005 |
| KPS at HCT             |      |                          |         |      |                          |        |
| 90-100                 | 2465 | Ref                      |         | 1071 | Ref                      |        |
| < 90                   | 746  | 0.086 (0.048 - 0.125)    | <0.0001 | 315  | 0.086 (0.014 – 0.157)    | 0.02   |
| Duration of remission  |      |                          |         |      |                          |        |
| < 1 year               | 382  | Ref                      |         | 277  | Ref                      |        |
| ≥ 1 year               | 558  | 0.108 (0.050-0.166)      | 0.0003  | 171  | 0.087 (-0.036 – 0.209)   | 0.16   |
| Extramedullary disease |      |                          |         |      |                          |        |
| Absent                 | 2918 | Ref                      |         | 1085 | Ref                      |        |
| Present                | 369  | 0.042 (-0.006 – 0.090)   | 0.09    | 325  | -0.006 (-0.068 – 0.057)  | 0.86   |
| Stem cell source       |      |                          |         |      |                          |        |
| Marrow                 | 2252 | Ref                      |         | 1033 | Ref                      |        |
| PBSC                   | 1063 | 0.034 (0.003-0.064)      | 0.03    | 393  | 0.046 (-0.017 – 0.108)   | 0.15   |
| Acute GVHD             |      |                          |         |      |                          |        |
| 0-1                    | 2347 | Ref                      |         | 928  | Ref                      |        |
| 2-4                    | 945  | 0.013 (-0.018 – 0.043)   | 0.41    | 495  | 0.074 (0.016 – 0.133)    | 0.01   |

|                                     |      |                         |        |      |                         |       |
|-------------------------------------|------|-------------------------|--------|------|-------------------------|-------|
| Race                                |      |                         |        |      |                         |       |
| Caucasian                           | 2797 | Ref                     |        | 1184 | Ref                     |       |
| Other                               | 501  | -0.012 (-0.049 – 0.024) | 0.51   | 234  | 0.034 (-0.042 – 0.110)  | 0.38  |
| Recipient CMV serostatus            |      |                         |        |      |                         |       |
| Negative                            | 1292 | Ref                     |        | 638  | Ref                     |       |
| Positive                            | 1888 | 0.012 (-0.016 – 0.040)  | 0.41   | 722  | 0.036 (-0.019 – 0.090)  | 0.20  |
| Donor CMV serostatus                |      |                         |        |      |                         |       |
| Negative                            | 1663 | Ref                     |        | 761  | Ref                     |       |
| Positive                            | 1517 | -0.000 (-0.028 – 0.027) | 0.98   | 599  | 0.094 (0.037 – 0.151)   | 0.001 |
| TBI in conditioning                 |      |                         |        |      |                         |       |
| No                                  | 1435 | Ref                     |        | 190  | Ref                     |       |
| Yes                                 | 1880 | -0.000 (-0.027 – 0.027) | 0.99   | 1236 | -0.073 (-0.161 – 0.015) | 0.11  |
| WBC at diagnosis                    |      |                         |        |      |                         |       |
| < 30                                | 2035 | Ref                     | 0.90*  | 803  | Ref                     | 0.97* |
| 30-100                              | 585  | -0.013 (-0.048 – 0.022) | 0.48   | 247  | -0.035 (-0.102 – 0.031) | 0.30  |
| > 100                               | 267  | 0.017 (-0.037 – 0.071)  | 0.54   | 162  | 0.038 (-0.054 – 0.129)  | 0.42  |
| Time from 1 <sup>st</sup> CR to HCT |      |                         |        |      |                         |       |
| < 6 months                          | 1557 | Ref                     | 0.08*  | 624  | Ref                     | 0.92* |
| 6-12 months                         | 286  | -0.029 (-0.067 – 0.009) | 0.13   | 152  | -0.000 (-0.074 – 0.075) | 0.99  |
| > 12 months                         | 44   | -0.063 (-0.130 – 0.004) | 0.07   | 23   | -0.010 (-0.176 – 0.156) | 0.91  |
| Age at transplant                   |      |                         |        |      |                         |       |
| 18-29                               | 972  | Ref                     | 0.50*  | 740  | Ref                     | 0.15* |
| 30-44                               | 1441 | -0.015 (-0.046 – 0.017) | 0.36   | 521  | 0.043 (-0.015 – 0.101)  | 0.14  |
| 45-69                               | 902  | 0.035 (-0.003 – 0.074)  | 0.07   | 165  | 0.041 (-0.048 – 0.130)  | 0.36  |
| Donor HLA match                     |      |                         |        |      |                         |       |
| HLA-identical sibling               | 2200 | Ref                     | 0.001* | 827  | Ref                     | 0.88* |
| Well matched                        | 478  | 0.043 (0.000 – 0.085)   | 0.05   | 250  | 0.013 (-0.061 – 0.087)  | 0.73  |
| Other matching                      | 550  | 0.060 (0.018 – 0.101)   | 0.005  | 299  | -0.022 (-0.086 – 0.043) | 0.52  |
| Cytogenetic risk                    |      |                         |        |      |                         |       |
| Good                                | 383  | Ref                     | 0.32*  | 55   | Ref                     | 0.76* |
| Intermediate/normal                 | 1824 | -0.003 (-0.046 – 0.040) | 0.89   | 595  | -0.035 (-0.183 – 0.112) | 0.64  |
| Poor                                | 334  | 0.072 (0.006 – 0.138)   | 0.03   | 352  | 0.018 (-0.136 – 0.172)  | 0.82  |

|                                           |      |                         |          |      |                         |          |
|-------------------------------------------|------|-------------------------|----------|------|-------------------------|----------|
| Unknown                                   | 774  | 0.000 (-0.047 – 0.048)  | 0.99     | 424  | -0.048 (-0.197 – 0.101) | 0.53     |
| GVHD prophylaxis                          |      |                         |          |      |                         |          |
| Cyclosporin-based                         | 2192 | Ref                     | 0.05*    | 897  | Ref                     | 0.71*    |
| Tacrolimus-based                          | 411  | 0.063 (0.015 – 0.112)   | 0.01     | 217  | 0.029 (-0.050 – 0.107)  | 0.47     |
| T-cell depletion                          | 322  | 0.010 (-0.036 – 0.057)  | 0.66     | 148  | -0.005 (-0.092 – 0.081) | 0.91     |
| ATG/Campath                               | 338  | 0.024 (-0.023 – 0.071)  | 0.32     | 140  | 0.034 (-0.063 – 0.132)  | 0.49     |
| Other                                     | 46   | 0.051 (-0.085 – 0.188)  | 0.46     | 22   | -0.005 (-0.217 – 0.206) | 0.96     |
| Disease status at HCT                     |      |                         |          |      |                         |          |
| 1st remission                             | 1971 | Ref                     | <0.0001* | 827  | Ref                     | <0.0001* |
| 2nd remission                             | 648  | 0.048 (0.012 – 0.083)   | 0.008    | 349  | 0.105 (0.040 – 0.169)   | 0.001    |
| Remission > 2nd                           | 41   | -0.030 (-0.117 – 0.058) | 0.50     | 58   | 0.129 (-0.023 – 0.281)  | 0.10     |
| Relapse/refractory                        | 626  | 0.165 (0.119 – 0.212)   | <0.0001  | 167  | 0.308 (0.186 – 0.429)   | <0.0001  |
| AML origin                                |      |                         |          |      |                         |          |
| De novo                                   | 2822 | Ref                     |          |      | Not applicable          |          |
| Secondary                                 | 412  | 0.045 (-0.000 – 0.091)  | 0.05     |      |                         |          |
| Chronic extensive GHVD                    |      |                         |          |      |                         |          |
| None                                      | 2256 | Ref                     |          | 962  | Ref                     |          |
| Prior or current                          | 1026 | 0.051 (0.020 – 0.083)   | 0.002    | 451  | 0.099 (0.037 – 0.161)   | 0.002    |
| Year of transplant                        |      |                         |          |      |                         |          |
| Continuous, per year                      | 3315 | 0.003 (0.000 – 0.006)   | 0.03     | 1426 | 0.004 (-0.002 – 0.010)  | 0.17     |
| Philadelphia-BCR/ABL                      |      |                         |          |      |                         |          |
| Negative                                  |      | Not applicable          |          | 722  | Ref                     | 0.08*    |
| Positive                                  |      |                         |          | 280  | 0.102 (0.022 – 0.182)   | 0.01     |
| Unknown                                   |      |                         |          | 424  | -0.005 (-0.063 – 0.053) | 0.86     |
| Time from diagnosis to 1 <sup>st</sup> CR |      |                         |          |      |                         |          |
| 0-8 weeks                                 |      | Not applicable          |          | 880  | Ref                     |          |
| > 8 weeks                                 |      |                         |          | 372  | 0.044 (-0.018 – 0.106)  | 0.16     |
| Type of ALL                               |      |                         |          |      |                         |          |
| T-cell                                    |      | Not applicable          |          | 240  | Ref                     | 0.003*   |
| B-cell                                    |      |                         |          | 929  | 0.104 (0.041 – 0.166)   | 0.001    |
| Other                                     |      |                         |          | 147  | 0.124 (0.018 – 0.229)   | 0.02     |

\* overall p-value

Abbreviations: PBPC, peripheral blood progenitor cells; GVHD, graft-versus-host disease; CMV, cytomegalovirus; TBI, total body irradiations; WBC, white blood count; CR, complete remission; HLA, human leukocyte antigen; BCR-ABL, breakpoint cluster region-Abelson gene rearrangement.

ACCEPTED MANUSCRIPT
